# Supplementary material for: Low oxygen levels decrease adaptive immune responses and ameliorate experimental asthma in mice
Source: PubMed Central journal article supplement (PMC9290649; doi:10.1111/all.15020), 2021-08-01

# Supplementary Figure E4

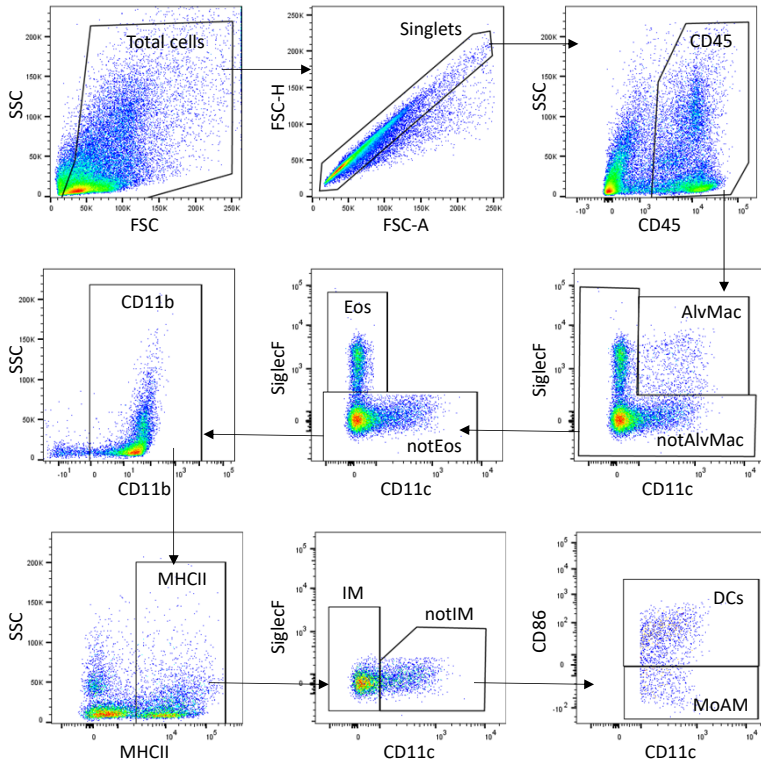

Supplement: ALL-77-870-s003.pdf [file ALL-77-870-s003.pdf]
