# Supplementary material for: Low oxygen levels decrease adaptive immune responses and ameliorate experimental asthma in mice
Source: PubMed Central journal article supplement (PMC9290649; doi:10.1111/all.15020), 2021-08-01
Supplement: ALL-77-870-s004.pdf [file ALL-77-870-s004.pdf]

**Supplementary Table 1**

| <b>Antigen</b> | <b>Label</b>     | <b>Company</b>  | <b>Clone</b> | <b>Isotype</b>    | <b>Dilution</b> |
|----------------|------------------|-----------------|--------------|-------------------|-----------------|
| CD1a           | BV 510           | BDBioscience    | PE           | Mouse IgG1, κ     | 1:20            |
| CD3            | FITC             | eBioscience     | 145-2C11     | Hamster IgG       | 1:20            |
| CD4            | APC              | Biolegend       | GK1.5        | Rat IgG2b, κ      | 1:100           |
| CD8            | PE               | Biolegend       | 53-6.7       | Rat IgG2a, κ      | 1:200           |
| CD11b          | V500             | BDBioscience    | M1/70        | Rat IgG2b, κ      | 1:50            |
| CD11c          | ef450            | eBioscience     | N418         | Hamster IgG       | 1:50            |
| CD14           | BV510            | BDBioscience    | MΦP9         | Mouse IgG2b, κ    | 1:20            |
| CD19           | AF700            | Biolegend       | 6D5          | Rat IgG2a, κ      | 1:100           |
| CD24           | PerCP Cy5.5      | BDBioscience    | M1/69        | Rat IgG2b, κ      | 1:500           |
| CD25           | APC-Cy7          | Biolegend       | PC61         | Rat IgG1, λ       | 1:50            |
| CD45           | FITC/PerCP-Cy5.5 | eBioscience     | 30-F11       | Rat IgG2b, κ      | 1:200           |
| CD64           | AF647            | BDBioscience    | X54-5/7.1    | Ms NOD/Lt IgG1, κ | 1:20            |
| CD86           | PE-Cy5           | eBioscience     | GL1          | Rat IgG2a, κ      | 1:50            |
| Gr-1           | PE-Cy7           | Biolegend       | RB6-8C5      | Rat IgG2b, κ      | 1:800           |
| MHC-II         | APC-Cy7          | Biolegend       | M5/114.15.2  | Rats IgG2b, κ     | 1:400           |
| Siglec F       | PE               | BDBioscience    | E50-2440     | Rat IgG2a, κ      | 1:20            |
| I-A/I-E        | PerCP/Cy5.5      | Biolegend       | M5/114.15.2  | Rat IgG2b, κ      | 1:50            |
| CD3            | BV510            | Biolegend       | 145-2C11     | Hamster IgG       | 1:50            |
| CD19           | PE-Cy7           | eBioscience     | eBio1D3      | Rat IgG2a, κ      | 1:50            |
| I-A/I-E        | APC eFluor 780   | eBioscience     | M5/114.15.2  | Rat IgG2a, κ      | 1:400           |
| CD11b          | SB600            | eBioscience     | M1/70        | Rat IgG2a, κ      | 1:50            |
| F4/80          | eFluor 660       | eBioscience     | BM8          | Rat IgG2a, κ      | 1:10            |
| CD45           | PerCP/Cy5.5      | BDBioscience    | HI30 (RUO)   | Mouse IgG1, κ     | 1:100           |
| CD4            | PE-Cy7           | eBioscience     | SK3          | Mouse IgG1, κ     | 1:20            |
| CD8            | SB600            | eBioscience     | RPA-T8       | Mouse IgG1, κ     | 1:20            |
| CD3            | AF700            | Biolegend       | UCHT1        | Mouse IgG1, κ     | 1:20            |
| CD19           | APC              | Biolegend       | HIB19        | Mouse IgG1, κ     | 1:20            |
| HLA-DR         | APC-eFluor 780   | eBioscience     | LN3          | Mouse IgG2b, κ    | 1:100           |
| MHC-II         | -                | eBioscience     | M5/114.15.2  | Rat IgG2a, κ      | 1:5000          |
| α-tubulin      |                  | Cell signalling | 11H10        | Rabbit IgG        | 1:5000          |
