# Supplementary material for: Low oxygen levels decrease adaptive immune responses and ameliorate experimental asthma in mice
Source: PubMed Central journal article supplement (PMC9290649; doi:10.1111/all.15020), 2021-08-01
Supplement: ALL-77-870-s006.pdf [file ALL-77-870-s006.pdf]

**Supplementary Table 3**

| Group    | Allergies                       | Donor | Sex | Age | IgE Total | House Dust Mites | Grass/Grains (Timothy) | Tree Pollen (Birch) | Animals (Cat) | Milk protein | Peanut |
|----------|---------------------------------|-------|-----|-----|-----------|------------------|------------------------|---------------------|---------------|--------------|--------|
| Control  | X                               | 1     | F   | 44  | 53.4      | 0.05             | 0.01                   | 0                   | 0             | 0.29         | 0      |
| Control  | X                               | 5     | M   | 27  | 11.4      | 0.23             | 0.07                   | 0.01                | 0             | 0.01         | 0      |
| Control  | X                               | 7     | M   | 29  | 18.7      | 0.03             | 0.03                   | 0.01                | 0.01          | 0.03         | 0.01   |
| Control  | X                               | 9     | M   | 25  | 14        | 0.03             | 0.04                   | 0.31                | 0             | 0.04         | 0.02   |
| Control  | X                               | 11    | F   | 24  | 29.5      | 0.04             | 0                      | 0                   | 0.01          | 0.01         | 0      |
| Control  | X                               | 13    | M   | 25  | 9.64      | 0.04             | 0                      | 0                   | 0             | 0.01         | 0      |
| Control  | X                               | 15    | M   | 33  | 77.1      | 0.04             | 3.16                   | 0.61                | 0.02          | 0.02         | 0.01   |
| Control  | X                               | 17    | M   | 31  | 61.6      | 0.14             | 0.01                   | 0.01                | 0.09          | 0.11         | 0.13   |
| Allergic | HDM/ Grass/ Pollen/ Animal Hair | 4     | F   | 43  | 396       | 1.18             | 2.78                   | 25.1                | 2.57          | 0.19         | 0.35   |
| Allergic | HDM/ Grass/ Pollen              | 6     | M   | 28  | 689       | 37.6             | 72.9                   | 0.05                | 0.67          | 0.5          | 1.9    |
| Allergic | HDM/ Grass/ Pollen/ Animal Hair | 8     | M   | 36  | 287       | 21.2             | 0.69                   | 0.33                | 0.35          | 0.06         | 0.53   |
| Allergic | HDM/ Animal Hair                | 10    | M   | 39  | 160       | 35.1             | 0.05                   | 0.01                | 0.01          | 0.02         | 0.15   |
| Allergic | HDM/ Animal Hair                | 12    | M   | 28  | 1543      | >100             | 22.4                   | 0.06                | 0.69          | 0.49         | 1.15   |
| Allergic | HDM/ Grass/ Animal Hair         | 14    | F   | 32  | 164       | 24.1             | 10.5                   | 0.02                | 1.16          | 0.03         | 0.03   |
| Allergic | HDM/ Grass/ Pollen/ Animal Hair | 16    | F   | 27  | 126       | 2.22             | 17                     | 3.47                | 0.67          | 0.04         | 0.23   |
