# Supplementary material for: Low oxygen levels decrease adaptive immune responses and ameliorate experimental asthma in mice
Source: PubMed Central journal article supplement (PMC9290649; doi:10.1111/all.15020), 2021-08-01
Supplement: ALL-77-870-s009.pdf [file ALL-77-870-s009.pdf]

**Supplementary Table 2**

| <b>Gene</b> | <b>Species</b> | <b>Accession No.</b> | <b>Forward primer (5'-3')</b>        | <b>Forward primer (3'-5')</b>    | <b>Amplicon (bp)</b> |
|-------------|----------------|----------------------|--------------------------------------|----------------------------------|----------------------|
| IL-5        | Mu             | NM_010558.1          | AAG CAA TGA GAC GAT<br>GAG GCT       | CCC CAC GGA CAG TTT<br>GAT TCT   | 110                  |
| IL-10       | Mu             | NM_010548.2          | AGG CGC TGT CAT CGA<br>TTT CT        | ATG GCC TTG TAG ACA<br>CCT TGG   | 104                  |
| IL-13       | Mu             | NM_008355.3          | GCC AAG ATC TGT GTC<br>TCT CCC       | CCA GGT CCA CAC TCC<br>ATA CC    | 115                  |
| IL-17A      | Mu             | NM_010552.3          | AGG ACG CGC AAA CAT<br>GAG TC        | GGA CAC GCT GAG CTT<br>TGA GG    | 119                  |
| IFNg        | Mu             | NM_008337.3          | CAG CAA CAG CAA GGC<br>GAA AAA GG    | TTT CCG CTT CCT GAG<br>GCT GGA T | 145                  |
| Muc5A       | Mu             | NM_010844.3          | TGC TTC TGT CCT GAG<br>GGT ATG       | CAT GTG TTG GTG CAG<br>TCA GTA G | 137                  |
| Spdef       | Mu             | NM_013891.4          | GAC GGA CGA CTC TTC<br>TGA CA        | CTG TTC GTG GTG CCA<br>CAT CT    | 140                  |
| B2M         | Mu             | NM_009735.3          | CGG CCT GTA TGC TAT<br>CCA GAA AAC C | TGT GAG GCG GGT GGA<br>ACT GTG   | 115                  |
| PBGD        | Mu             | NM_001110251         | GCC AGA GAA AAGT<br>GCC GTG GG       | TCC GGA GGC GGG TGT<br>TGA GG    | 115                  |
